# Supplementary material for: Therapeutic Potential of Peucedanum japonicum Thunb. and Its Active Components in a Delayed Corneal Wound Healing Model Following Blue Light Irradiation-Induced Oxidative Stress
Source: MDPI journal article supplement (doi:10.3390/antiox12061171), 2023-05-29
Supplement: s1 [file s1]

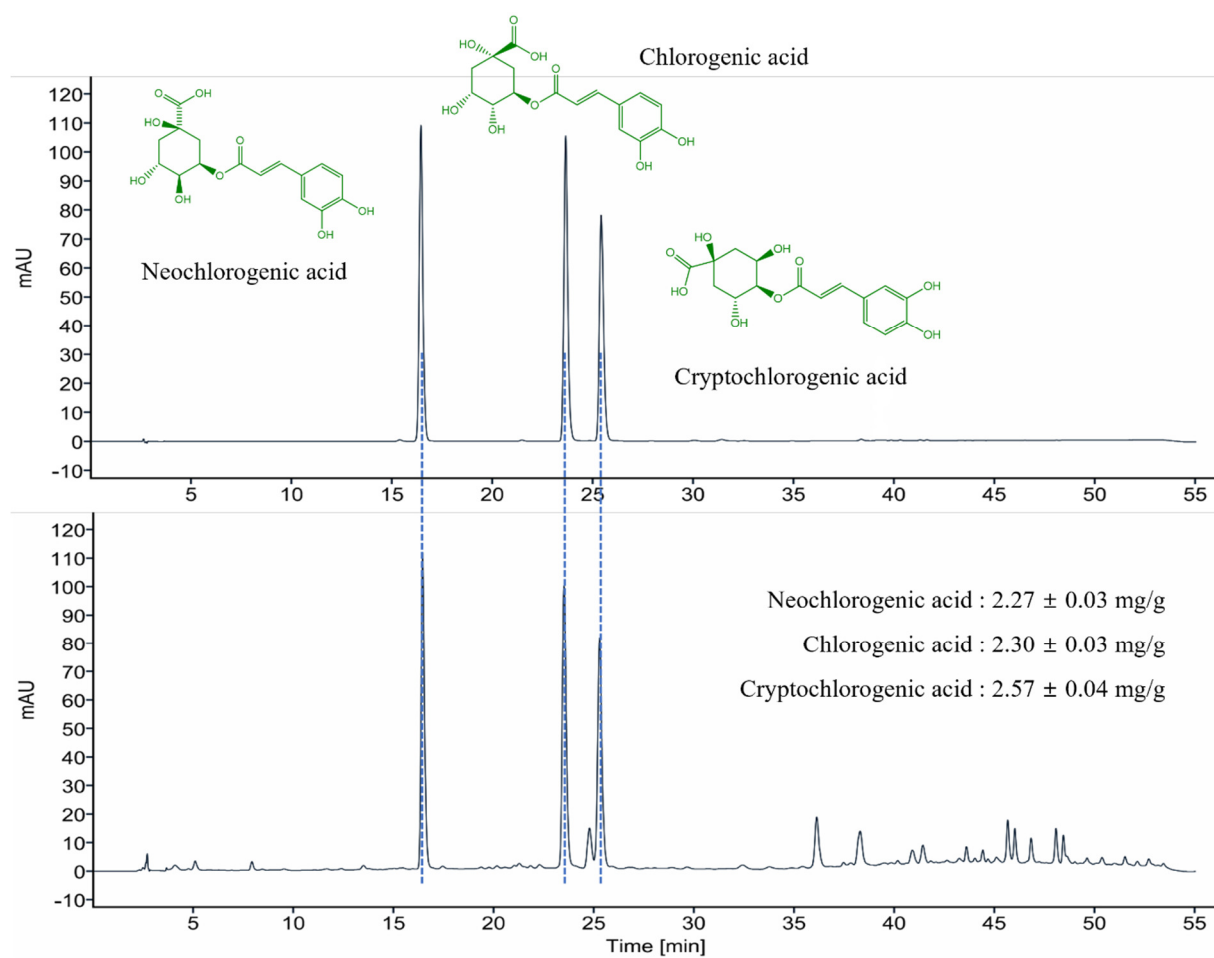

**Figure S1.** HPLC chromatograms of chlorogenic acid (CA), neochlorogenic acid (NCA), and cryptochlorogenic acid (CCA) standards compound and *Peucedanum japonicum* Thunberg leaf extract (PJE).

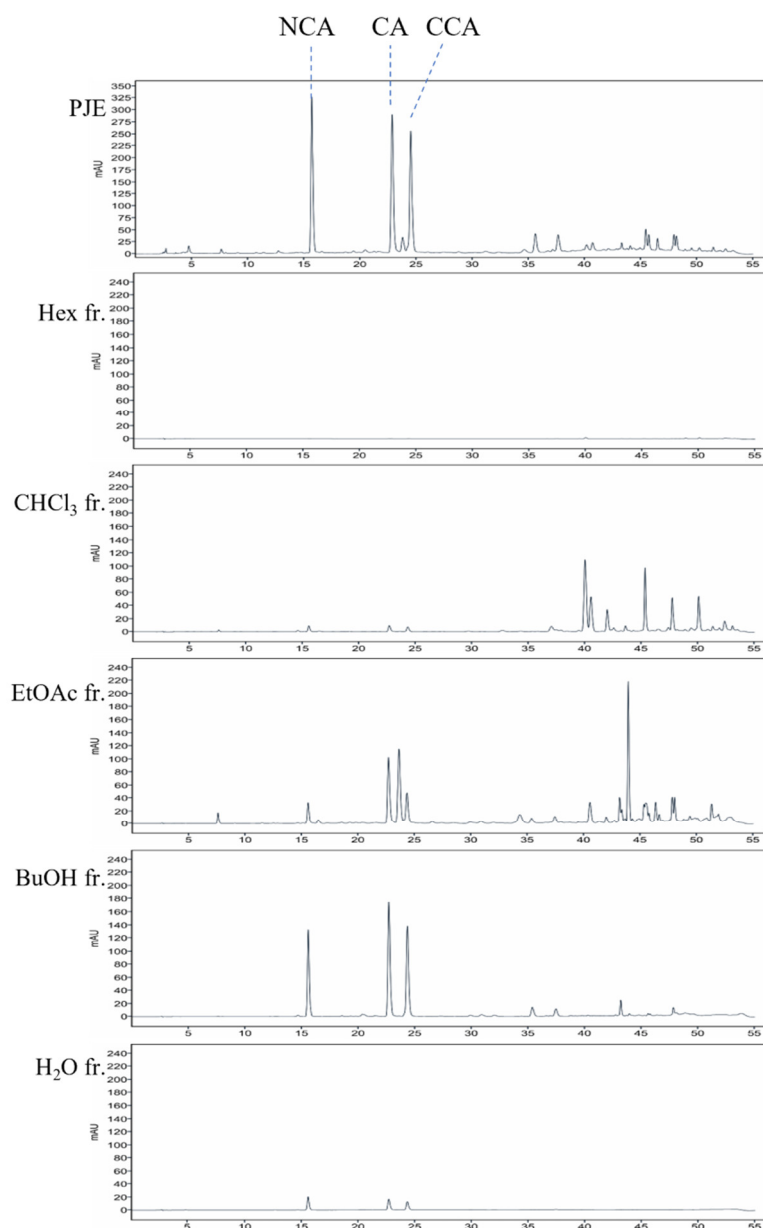

**Figure S2. HPLC chromatograms of PJE and its fractions after solvent fractionation. The CA, NCA and CCA peaks are indicated.**

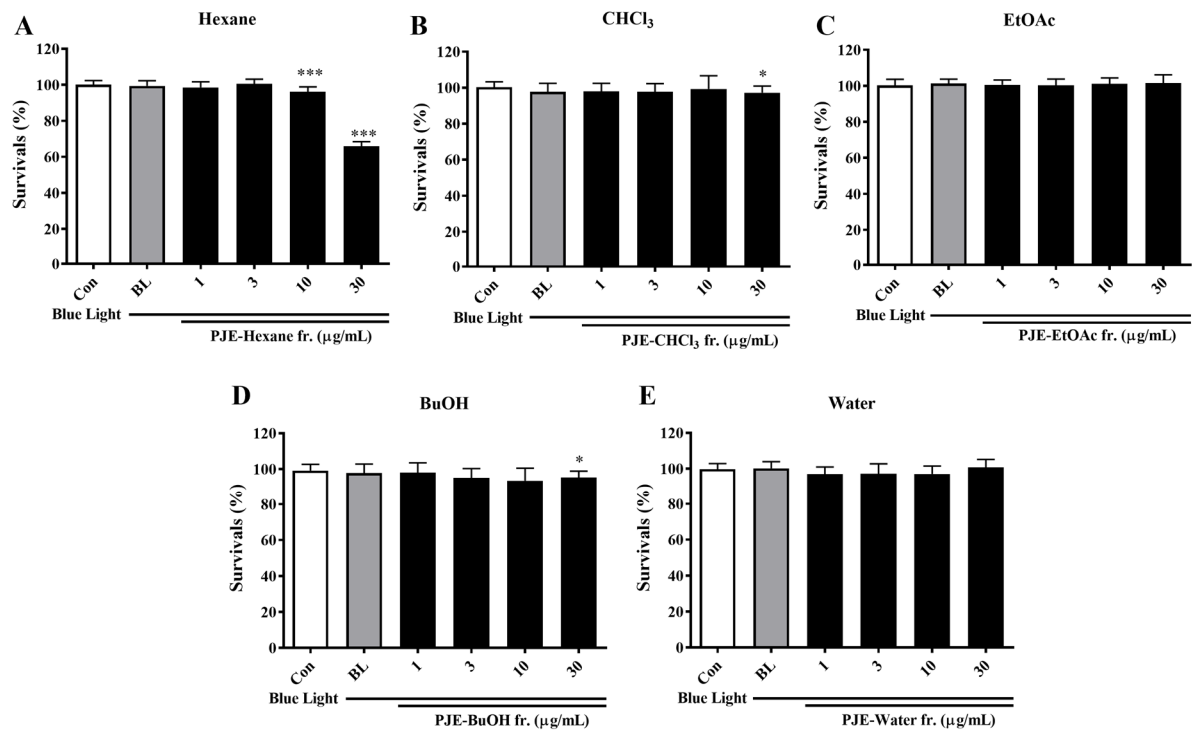

**Figure S3. Effects of PJE solvent fractionation on HCEC survival.** The data are presented as the means  $\pm$  SDs.

\* $P < 0.05$ , \*\* $P < 0.01$ , \*\*\* $P < 0.001$  compared to BL.

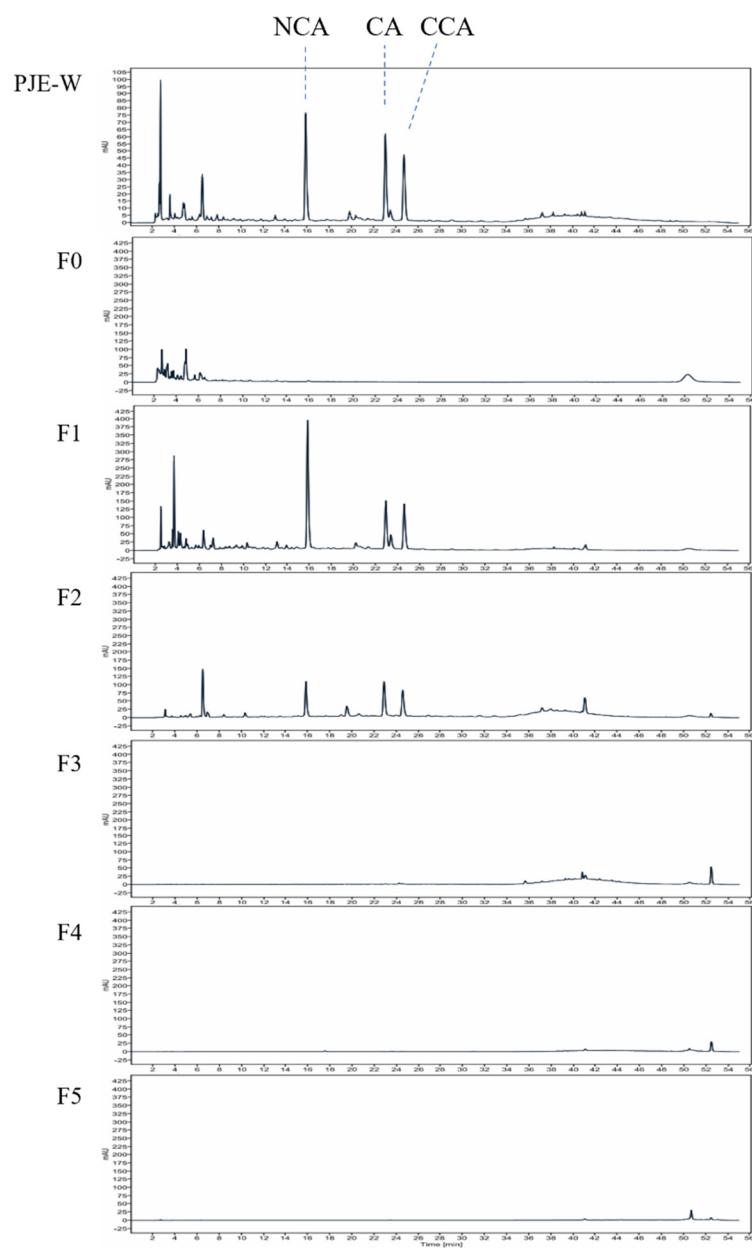

**Figure S4. HP-20 open column chromatography of PJE/W and its fractions. The CA, NCA and CCA peaks are indicated.**

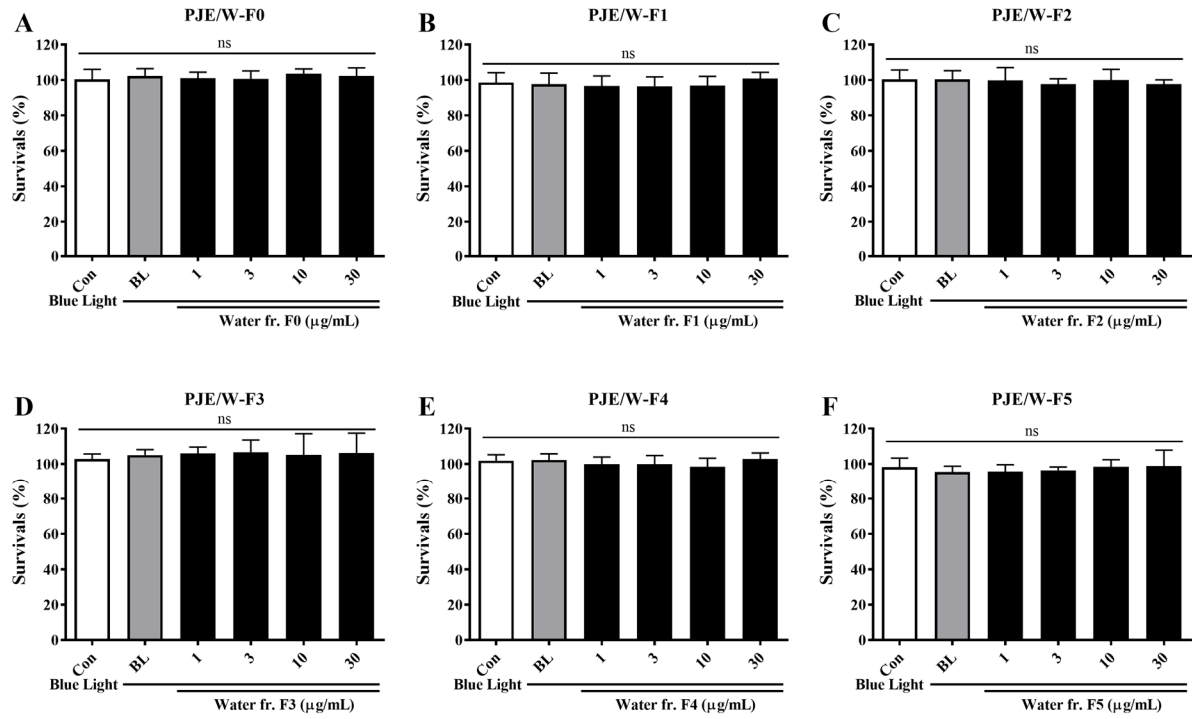

**Figure S5. Effects of HP-20 open column chromatography fractionation of PJE/W on HCEC survival.** The data are presented as the means  $\pm$  SDs. ns, not significant.

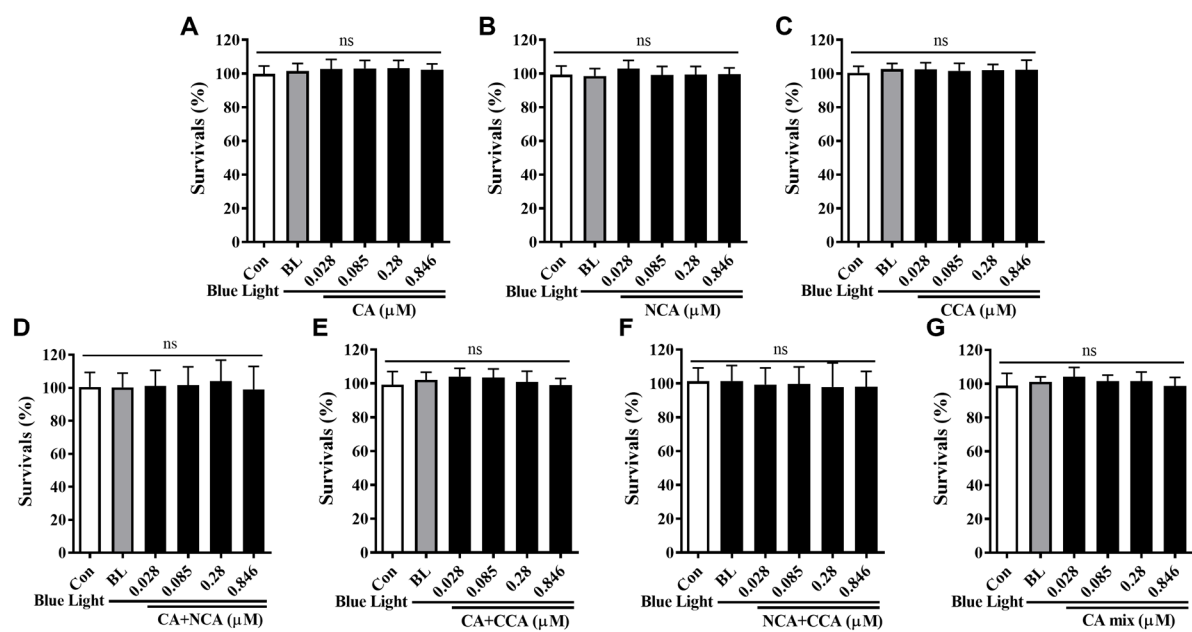

**Figure S6. Effects of the major compounds of PJE on HCEC survival.** The data are presented as the means  $\pm$  SDs. ns, not significant.
